# Supplementary material
Source: publisher site journal article supplement (http://www.kjim.org/upload/media/kjim-2021-427-suppl1.pdf)
Supplement: Supplementary file 1 [file kjim-2021-427-suppl1.pdf]

**Supplementary Table 1. Characteristics of recurrent acute myocardial infarction**

| Characteristic             | Total (n = 359) |
|----------------------------|-----------------|
| Initial diagnosis          |                 |
| STEMI                      | 182             |
| NSTEMI                     | 177             |
| Interval to recurrence     |                 |
| Acute ( $\leq$ 1 day)      | 25              |
| Subacute ( $\leq$ 30 days) | 46              |
| $\leq$ 6 mo                | 78              |
| $\leq$ 1 yr                | 56              |
| $\leq$ 2 yr                | 79              |
| $>$ 2 yr                   | 75              |
| Diagnosis at recurrence    |                 |
| Acute stent thrombosis     | 25              |
| Subacute stent thrombosis  | 17              |
| STEMI                      | 83              |
| NSTEMI                     | 234             |

STEMI, ST elevation myocardial infarction; NSTEMI, non-ST elevation myocardial infarction.
